# Supplementary material for: Genome-Wide Association Study of Male Sexual Orientation
Source: PubMed Central journal article supplement (PMC5721098; doi:10.1038/s41598-017-15736-4), 2017-12-07
Supplement: 41598_2017_15736_MOESM1_ESM.pdf [file 41598_2017_15736_MOESM1_ESM.pdf]

# Genome-Wide Association Study of Male Sexual Orientation

Alan R. Sanders<sup>1,2,\*</sup>, Gary W. Beecham<sup>3</sup>, Shengru Guo<sup>3</sup>, Khytam Dawood<sup>4</sup>, Gerulf Rieger<sup>5</sup>, Judith A. Badner<sup>6</sup>, Elliot S. Gershon<sup>2</sup>, Ritesha S. Krishnappa<sup>7</sup>, Alana B. Kolundzija<sup>8</sup>, Jubao Duan<sup>1,2</sup>, MGS Collaboration<sup>+</sup>, Pablo V. Gejman<sup>1,2</sup>, J. Michael Bailey<sup>9</sup>, Eden R. Martin<sup>3</sup>

## Supplementary Information

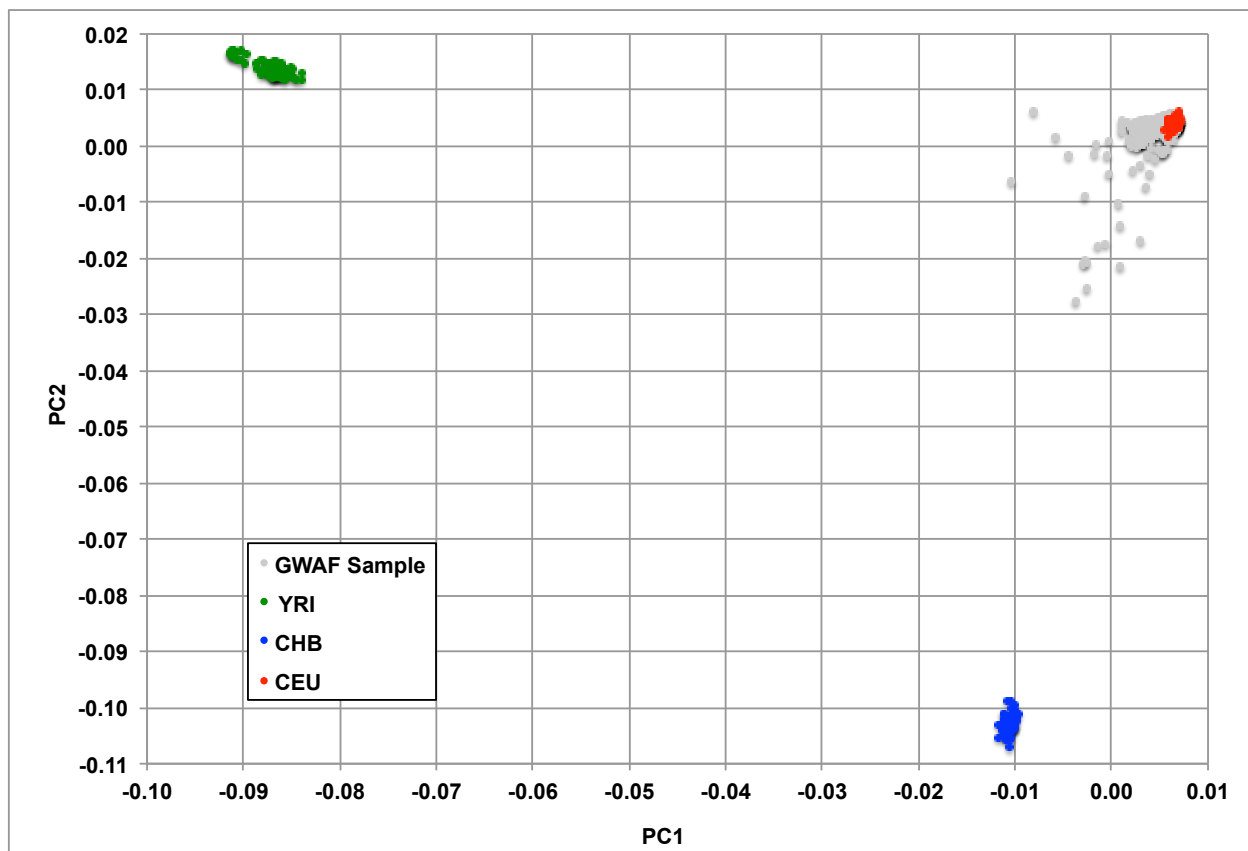

**Supplementary Figure S1. PCA Plot of Top Two PC's of Study Samples and HapMap Reference Populations.** Plot of PC1 and PC2 for one randomly chosen individual in each of 1,871 analyzed families along with 317 unrelated individuals from CEU, YRI and CHB HapMap reference populations<sup>67</sup>.

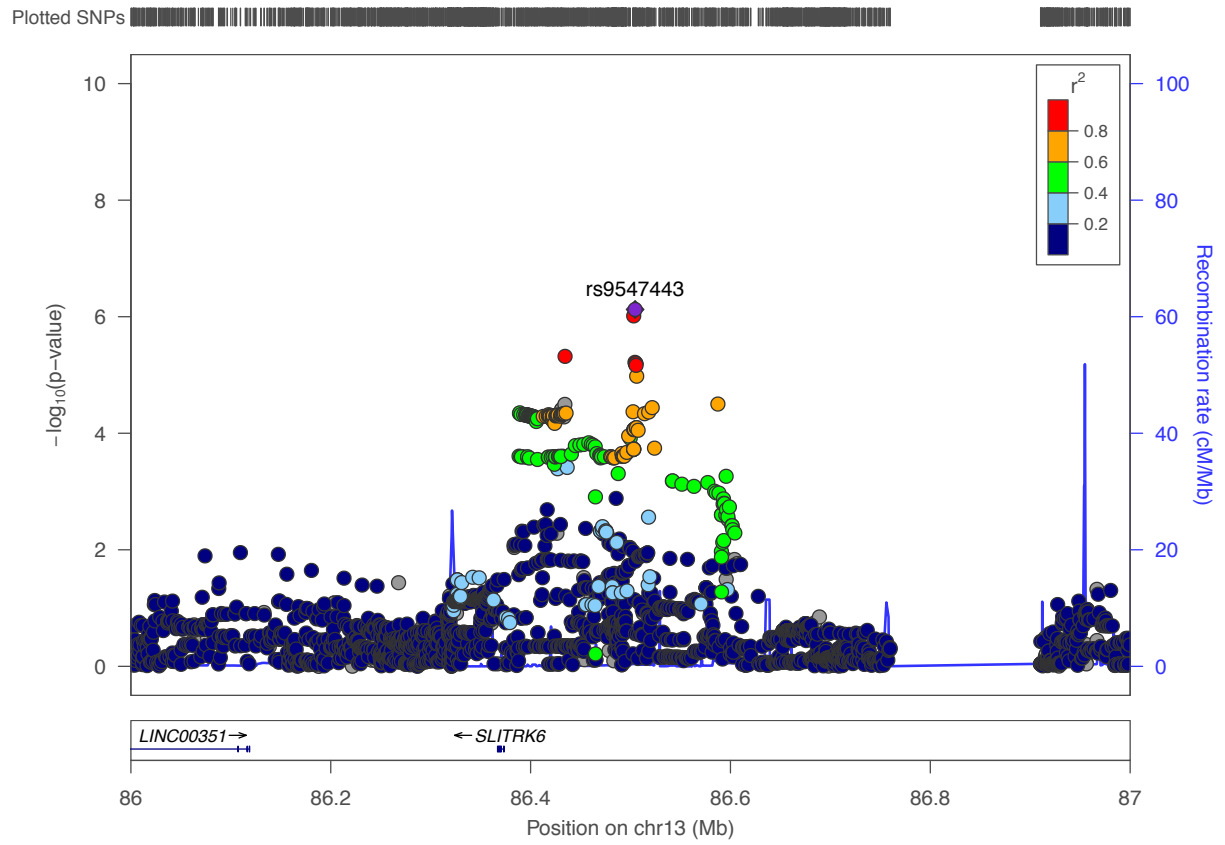

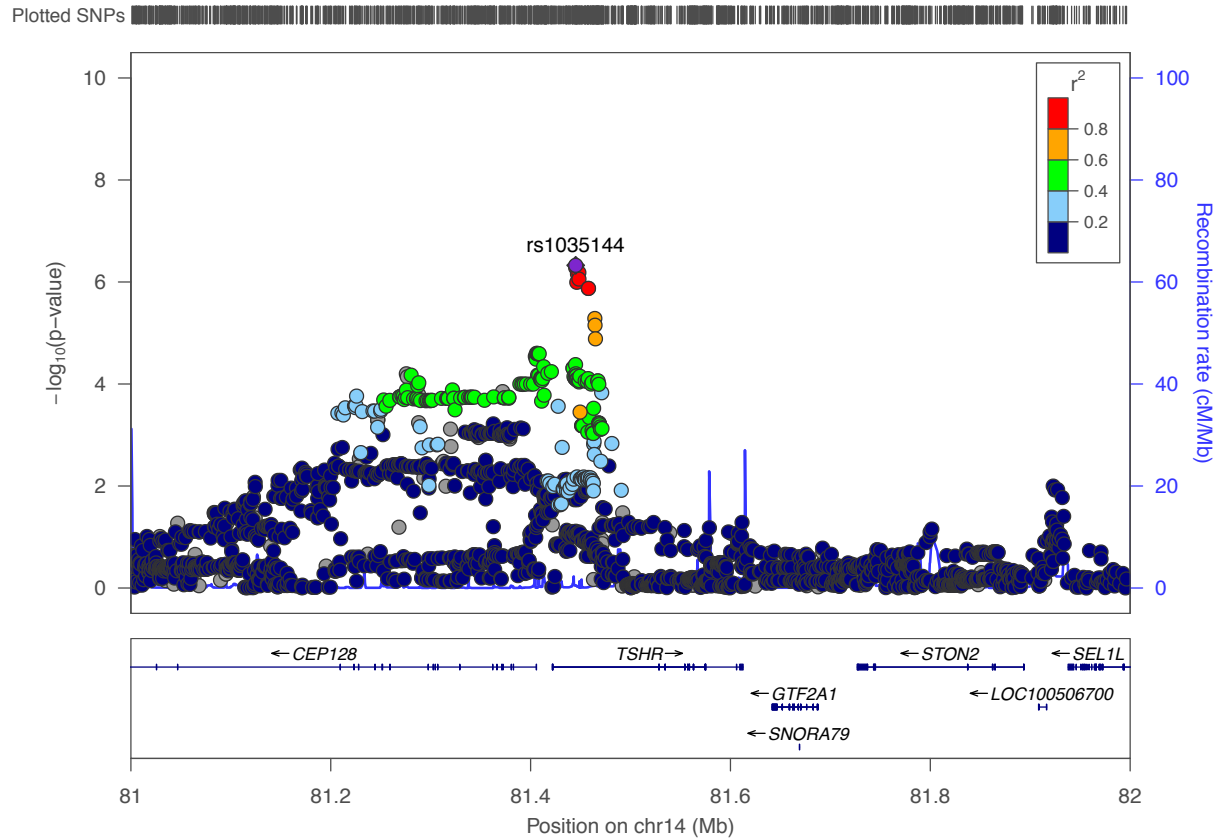

**Supplementary Figure S2. Regional Association Plots of Regions in Supplementary Table S1.** These plots indicate position (GRCh37/hg19), strength of association by  $-\log_{10}(\text{p-value})$ , and recombination rate (cM/Mb), with  $r^2$  to the most associated SNP color coded as indicated. Density of assayed SNPs is indicated above, and nearby genes below the plot. The plotted regions are from 86-87 Mb on chromosome 13 (**A**) and from 81-82 Mb on chromosome 14 (**B**).

| Chr | bp         | SNP        | EA | RA   | EAF   | info  | beta   | se    | p-value  |
|-----|------------|------------|----|------|-------|-------|--------|-------|----------|
| 13  | 86,434,490 | rs9547412  | A  | G    | 0.710 | 0.992 | 0.340  | 0.074 | 4.79E-06 |
| 13  | 86,503,179 | rs4312206  | G  | A    | 0.720 | 0.980 | 0.370  | 0.076 | 9.68E-07 |
| 13  | 86,504,474 | rs9531890  | A  | G    | 0.736 | 0.986 | 0.343  | 0.076 | 6.07E-06 |
| 13  | 86,504,577 | rs9547443  | C  | T    | 0.719 | 0.988 | 0.371  | 0.075 | 7.51E-07 |
| 13  | 86,504,968 | rs75843441 | C  | CTTG | 0.734 | 0.990 | 0.342  | 0.076 | 6.39E-06 |
| 13  | 86,505,172 | rs9547444  | T  | C    | 0.734 | 0.989 | 0.342  | 0.076 | 6.39E-06 |
| 13  | 86,505,211 | rs9547445  | A  | G    | 0.734 | 0.989 | 0.342  | 0.076 | 6.39E-06 |
| 13  | 86,505,374 | rs9547446  | G  | A    | 0.734 | 0.989 | 0.342  | 0.076 | 6.39E-06 |
| 13  | 86,505,542 | rs9547447  | G  | A    | 0.733 | 0.986 | 0.341  | 0.076 | 6.83E-06 |
| 14  | 81,445,108 | rs4411444  | A  | G    | 0.510 | 0.988 | -0.327 | 0.065 | 5.24E-07 |
| 14  | 81,445,121 | rs1035144  | C  | T    | 0.509 | 0.988 | -0.328 | 0.065 | 4.71E-07 |
| 14  | 81,446,242 | rs8003515  | G  | C    | 0.515 | 0.979 | -0.320 | 0.065 | 1.01E-06 |
| 14  | 81,446,908 | rs2300516  | A  | G    | 0.512 | 0.989 | -0.322 | 0.065 | 6.96E-07 |
| 14  | 81,448,282 | rs3783950  | C  | G    | 0.512 | 0.989 | -0.323 | 0.065 | 6.55E-07 |
| 14  | 81,448,382 | rs3783949  | T  | G    | 0.525 | 0.990 | -0.318 | 0.065 | 8.76E-07 |
| 14  | 81,457,788 | rs2371463  | G  | A    | 0.525 | 0.973 | -0.316 | 0.065 | 1.34E-06 |
| 14  | 81,457,940 | rs724170   | G  | A    | 0.525 | 0.973 | -0.316 | 0.065 | 1.33E-06 |
| 14  | 81,464,279 | rs12323356 | A  | G    | 0.551 | 0.946 | -0.305 | 0.067 | 5.19E-06 |
| 14  | 81,464,486 | rs4903962  | A  | G    | 0.551 | 0.946 | -0.301 | 0.067 | 7.03E-06 |

**Supplementary Table S1: Regions on chromosomes 13 and 14 with SNPs associated at  $p < 10^{-5}$ .** Note: Base pair location per Human Feb. 2009 (GRCh37/hg19); EA, RA, and EAF refer to the effect allele, reference allele, and effect-allele frequency, respectively.

| Number of homosexual brothers/family | Family count | Number of homosexual brothers | Number of heterosexual brothers | Number of total brothers |
|--------------------------------------|--------------|-------------------------------|---------------------------------|--------------------------|
| 0                                    | 6            | 0                             | 6                               | 6                        |
| 1                                    | 221          | 221                           | 7                               | 228                      |
| 2                                    | 349          | 698                           | 32                              | 730                      |
| 3                                    | 21           | 63                            | 1                               | 64                       |
| 4                                    | 2            | 8                             | 0                               | 8                        |
| Totals                               | 599          | 990                           | 46                              | 1,036                    |

**Supplementary Table S2: SNP genotyped individuals from linkage families analyzed for GWAS.** Note: These counts reflect 802 typed brothers from 372 multiplex families previously analyzed for linkage <sup>23</sup>, and 234 typed brothers from 227 multiplex families not analyzed for linkage (since not enough brothers were collected).

| <b>Platform</b>                    | <b>Affymetrix 5.0</b> | <b>Affymetrix 6.0</b> | <b>Totals</b> |
|------------------------------------|-----------------------|-----------------------|---------------|
| Original Sample N                  | 1,180                 | 1,226                 | 2,406         |
| Dropped for missingness $\geq 5\%$ | 2                     | 4                     | 6             |
| Dropped from duplication checks    | 5                     | 1                     | 6             |
| Dropped from relatedness checks    | 9                     | 11                    | 20            |
| Dropped for ancestry outliers      | 32                    | 0                     | 32            |
| Remaining Sample N                 | 1,132                 | 1,210                 | 2,342         |

**Supplementary Table S3: Sample QC.** Note: One member of each the 34 inter-platform (Affymetrix 5 & Affymetrix 6) duplicate pairs was removed, leaving 2,308 analyzed samples.

| <b>Platform</b>                                                                                                          | <b>Affymetrix 5.0</b> | <b>Affymetrix 6.0</b> |
|--------------------------------------------------------------------------------------------------------------------------|-----------------------|-----------------------|
| Original SNPs (N)                                                                                                        | 440,793               | 436,218               |
| Dropped for missingness $\geq 5\%$                                                                                       | 32,481                | 30,045                |
| Dropped HWE deviation $p < 0.000001$                                                                                     | 11                    | 861                   |
| Dropped due to non-overlapping SNP (i.e., missing from other platform)                                                   | 24,242                | 21,253                |
| Dropped due to discrepancy for any of the 34 inter-platform duplicates                                                   | 22,189                | 22,189                |
| Remaining merged (Affy 5 & Affy 6) SNP N                                                                                 | 361,870               | 361,870               |
| Merged SNP N                                                                                                             | 361,870               |                       |
| Dropped due to not mapping to Chr1-Chr23                                                                                 | 478                   |                       |
| Dropped prior to imputation for unresolvable strand issues, e.g., A/T and C/G SNPs with similar allele frequencies       | 59                    |                       |
| Dropped prior to imputation for mismatching typed alleles to reference SNPs even after addressing strand inconsistencies | 252                   |                       |
| After imputation, the total remaining typed SNPs                                                                         | 361,081               |                       |

**Supplementary Table S4: SNP QC.** Note: After imputation, typed SNPs were further filtered to only retain for analysis those SNPs with MAF  $\geq 5\%$  and missingness  $< 1\%$ , resulting in 200,367 typed SNPs for analysis.
